# Supplementary figures and images for: New Observation in Biocontrol of Penicillium caperatum against Fusarium oxysporum on Saposhnikovia divaricata and as a Plant Growth Promoter
Source: MDPI journal article supplement (doi:10.3390/fermentation9040361), 2023-04-07

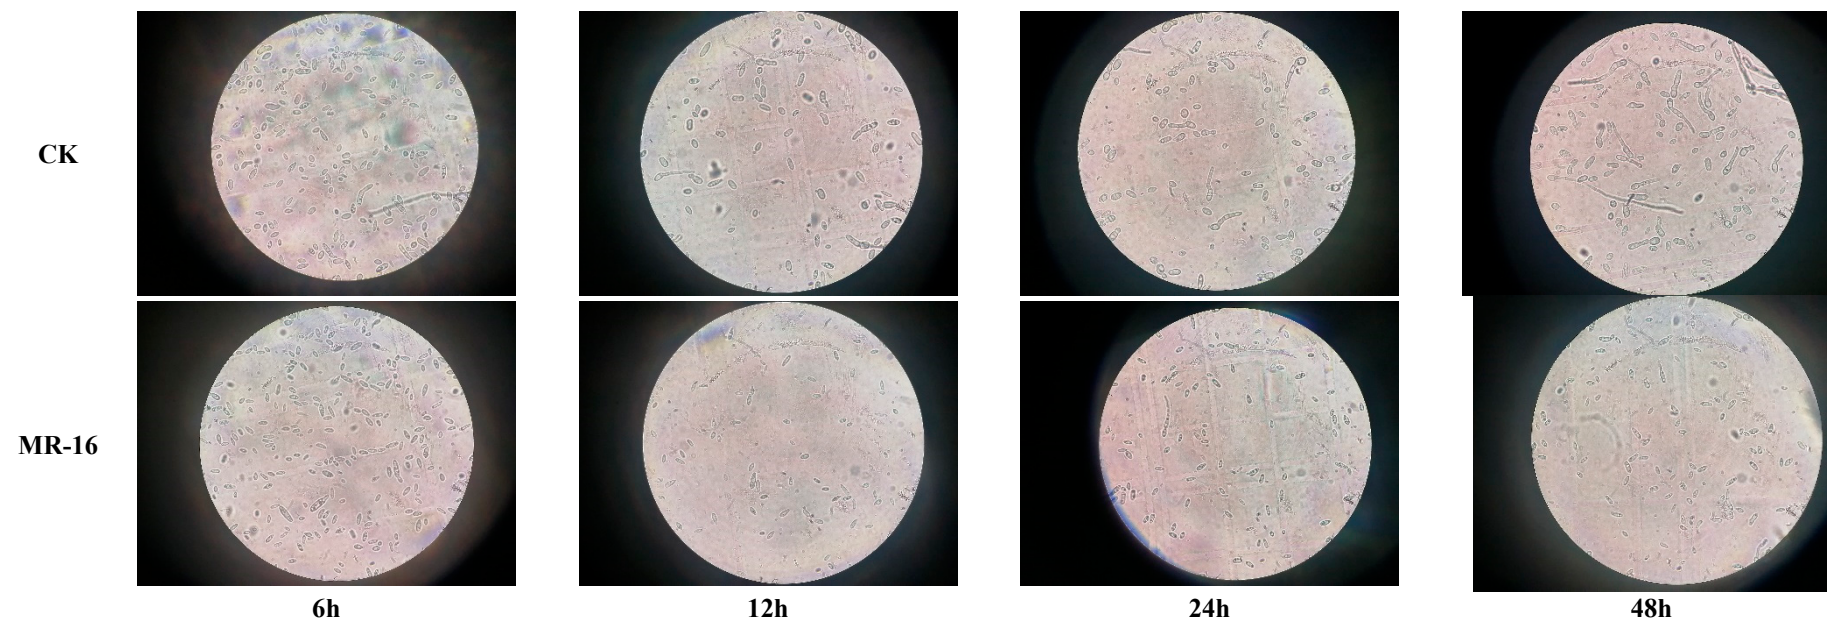

**Figure S1.** Effects of culture filtrate of MR-16 on the spore germination of *F. oxysporum*.

Supplement: s1 [file s1]
